# Supplementary material for: Heterogeneous endocrine cell composition defines human islet functional phenotypes
Source: PubMed Central journal article supplement — bioRxiv. 2025 Aug 25:2024.11.20.623809. Originally published 2024 Nov 21. Preprint. [Version 2] doi: 10.1101/2024.11.20.623809 (PMC11601672; doi:10.1101/2024.11.20.623809), 2025-08-25
Supplement: media-1.pdf [file media-1.pdf]

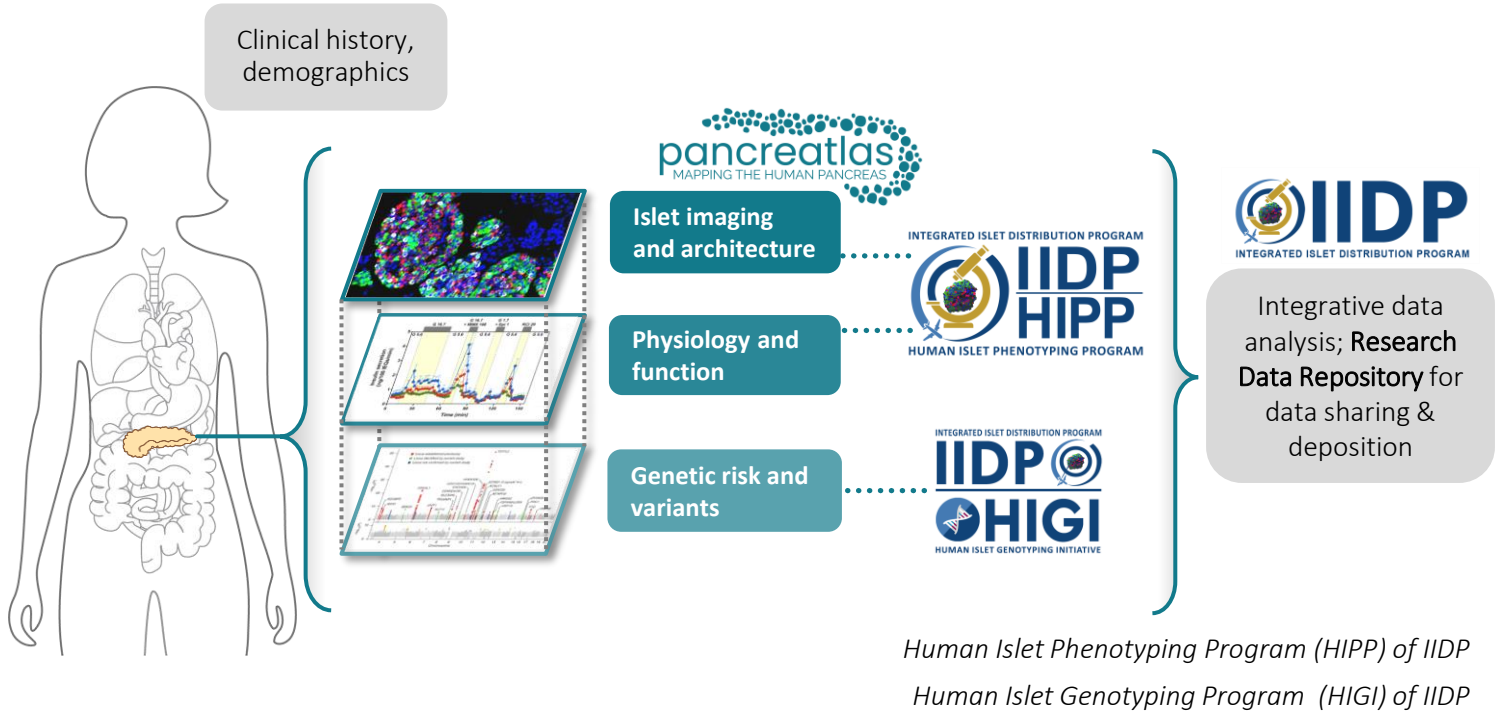

A

## Imaging of islet preparation for morphology

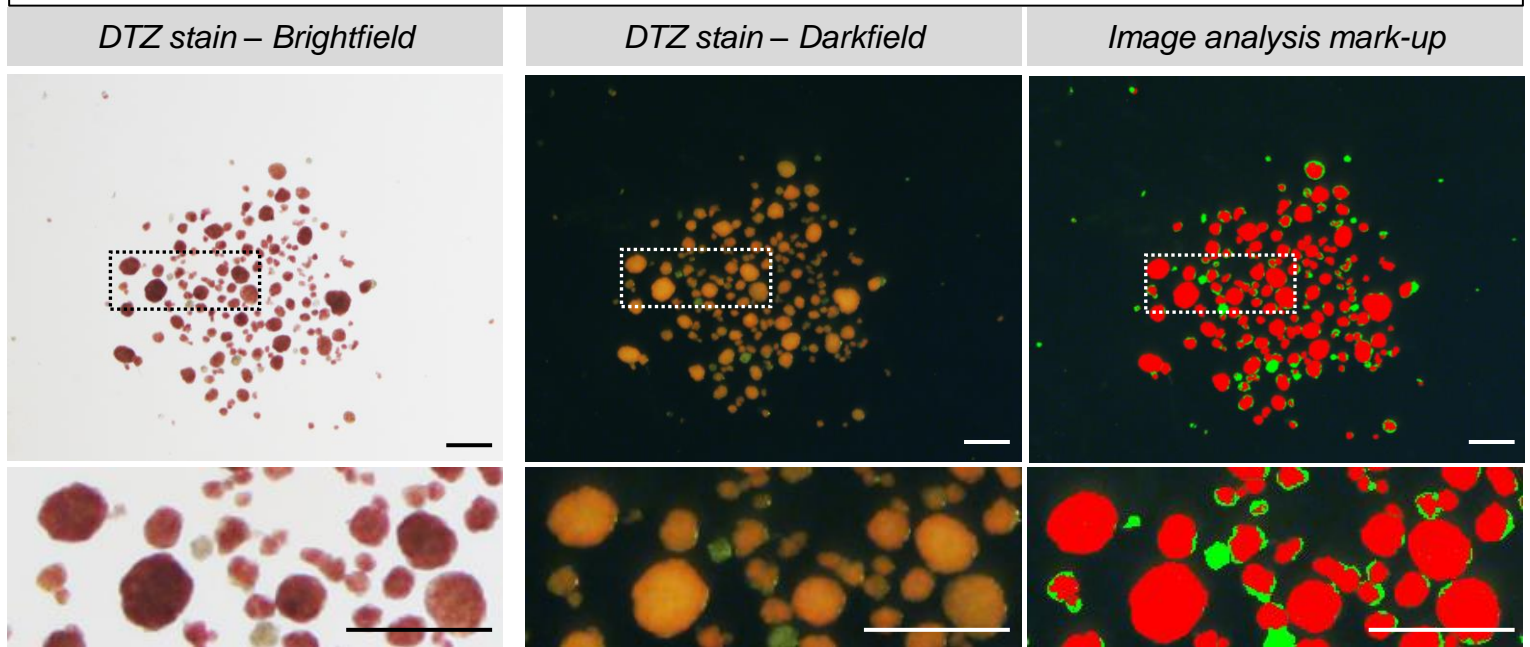

Calculated IEQ: 94.8; Calculated purity: 85%

B

## Islet imaging for morphology &amp; functional analysis

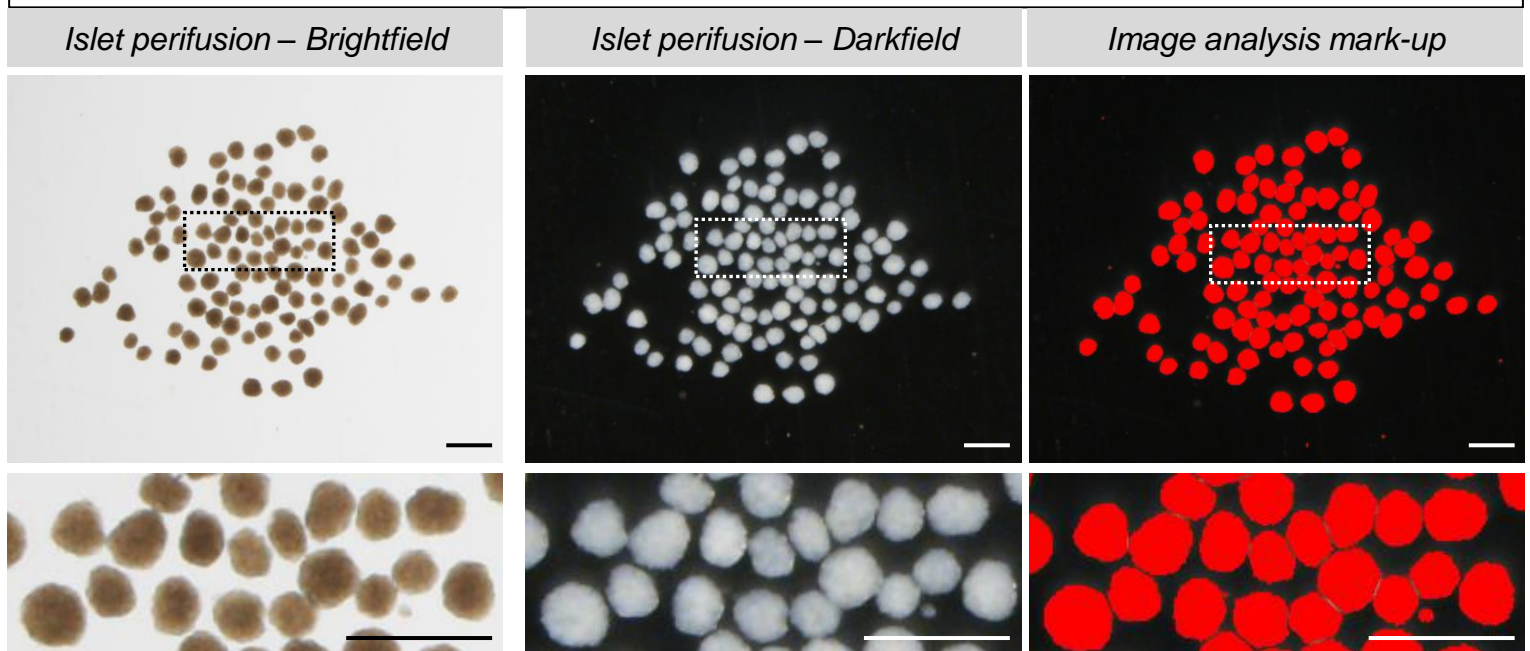

Calculated IEQ: 269

Spearman r

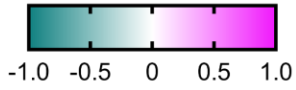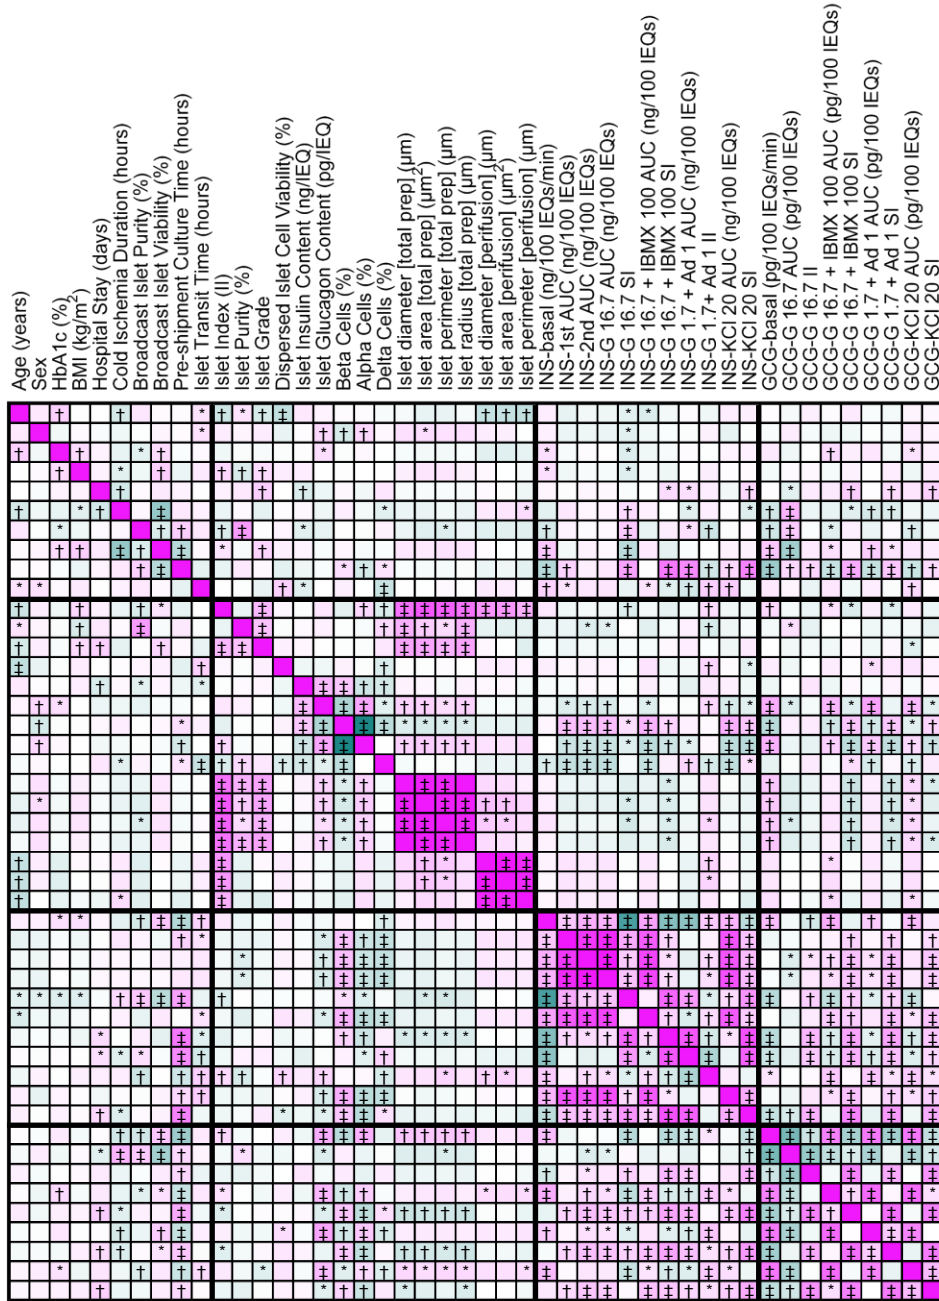

Donor traits & islet processing

Islet morphology & composition traits

Insulin secretion traits

Glucagon secretion traits



$n = 86$  Admixed American,  $n = 21$  African,  $n = 11$  East Asian,  $n = 150$  European

**A**

*Insulin secretion traits*

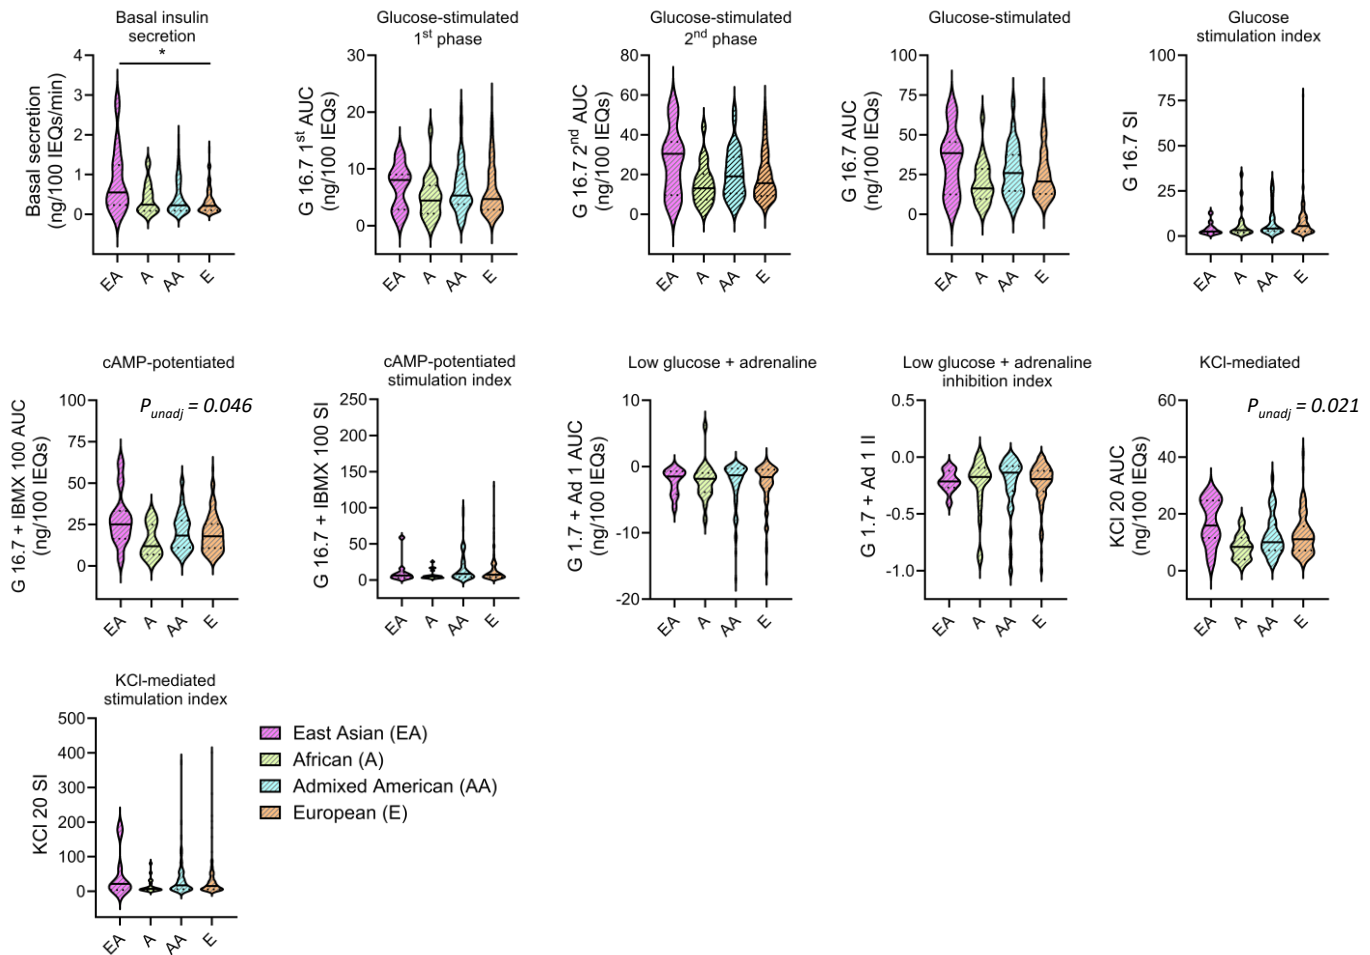

**B**

*Glucagon secretion traits*

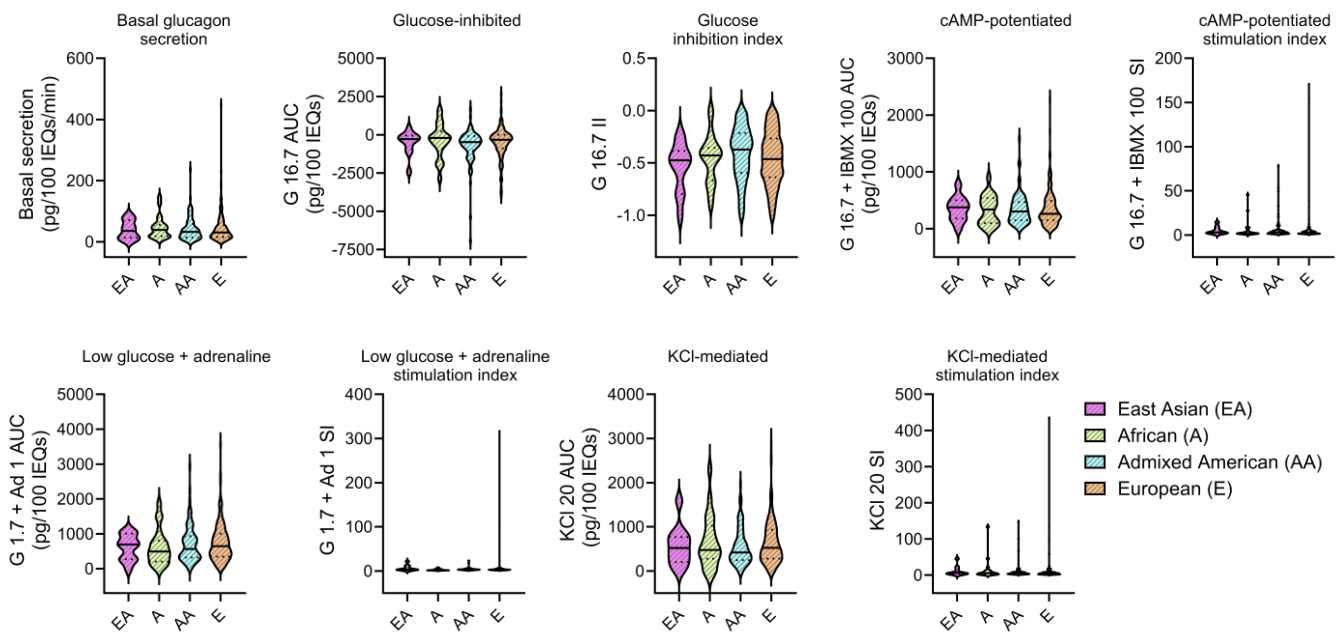

**A**

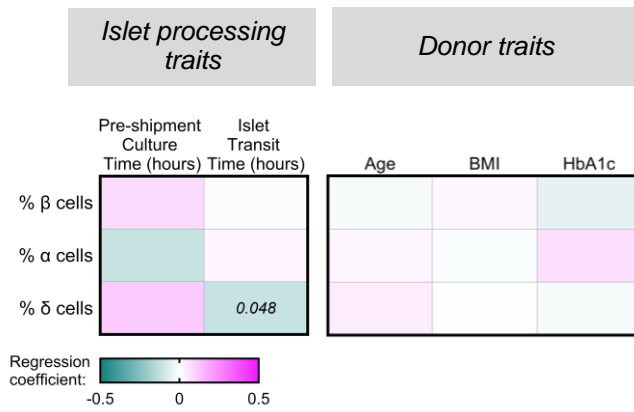

**B**

| Islet composition       |                            | % $\beta$ cells | % $\alpha$ cells | % $\delta$ cells |
|-------------------------|----------------------------|-----------------|------------------|------------------|
| Global adjusted p-value | Sex                        | 0.0065          | 0.007            | n.s.             |
|                         | Reported race or ethnicity | 0.003           | 0.003            | n.s.             |
|                         | Genetic Ancestry           | 0.001           | 0.001            | n.s.             |
|                         | Isolation Center           | n.s.            | n.s.             | n.s.             |

**C**

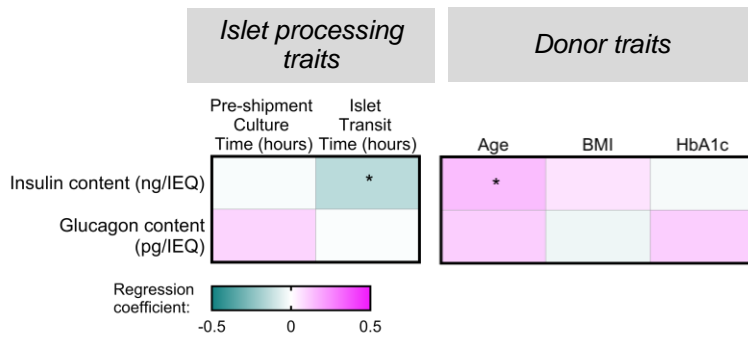

**D**

| Hormone content         |                            | Insulin content (ng/IEQ) | Glucagon content (pg/IEQ) |
|-------------------------|----------------------------|--------------------------|---------------------------|
| Global adjusted p-value | Sex                        | n.s.                     | 0.015                     |
|                         | Reported race or ethnicity | n.s.                     | n.s.                      |
|                         | Genetic Ancestry           | n.s.                     | n.s.                      |
|                         | Isolation Center           | n.s.                     | n.s.                      |

**A**

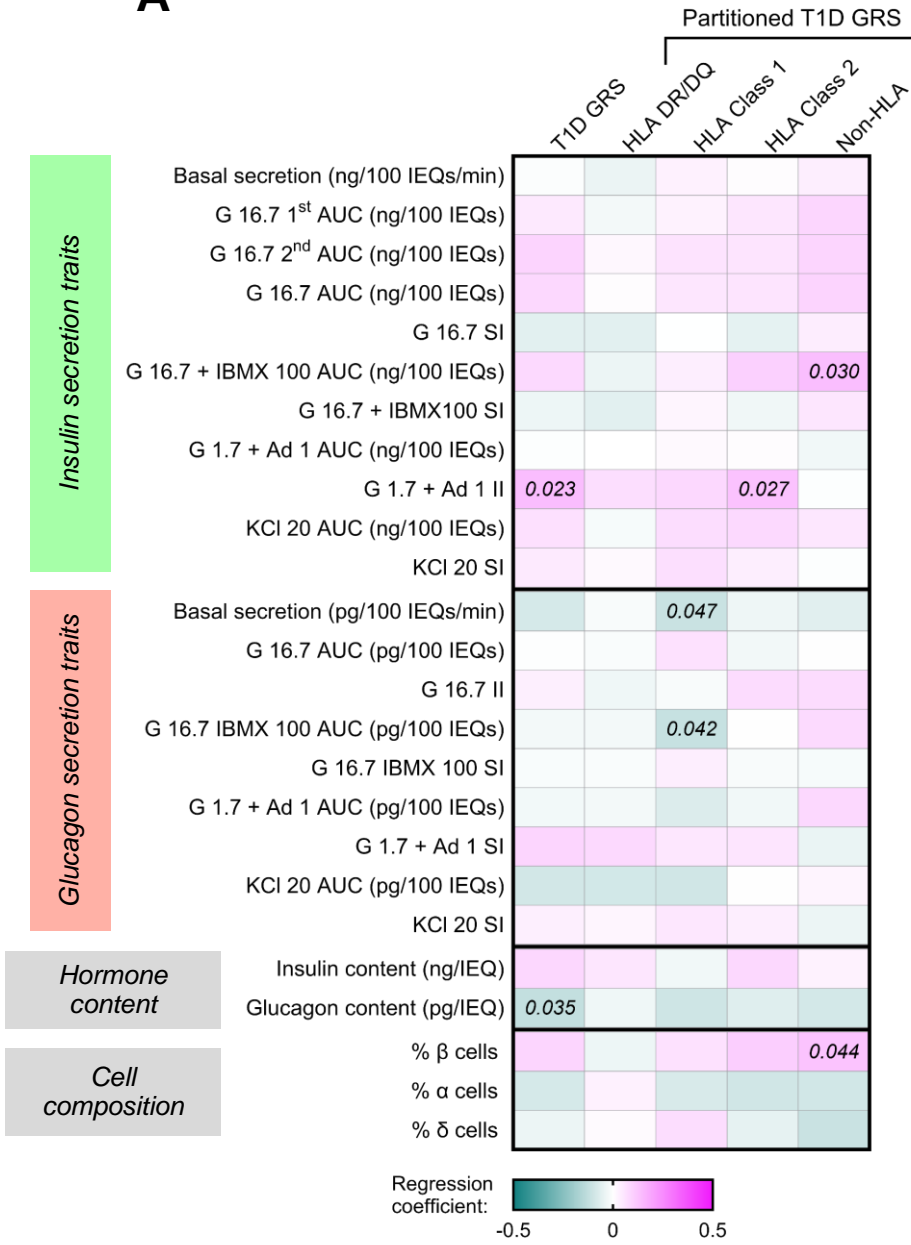

**B**

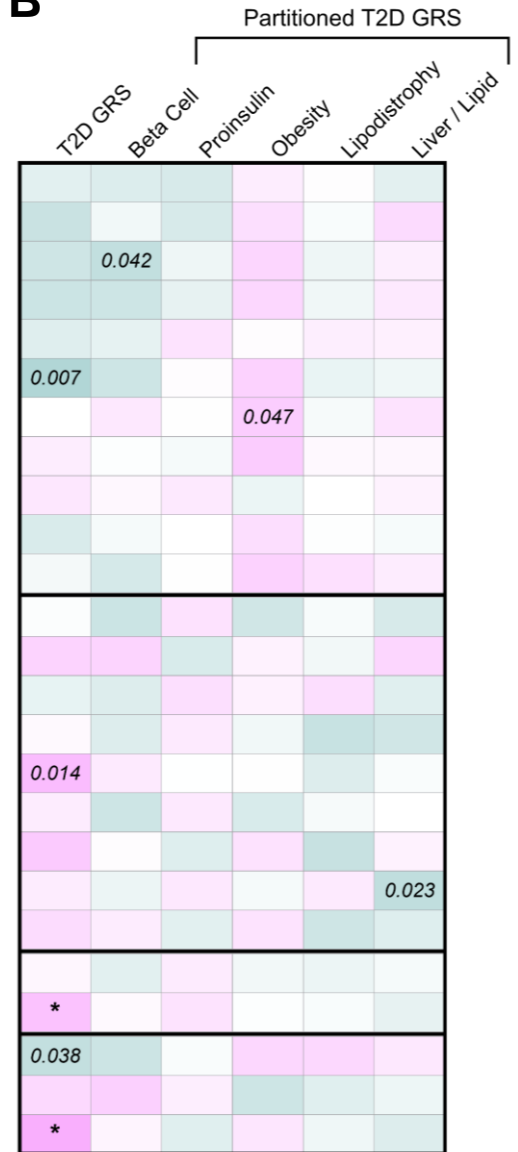

**Extended Data Table 1, related to Figure 2. Insulin secretion is highly heterogeneous amongst donors.**

| Insulin Secretion Trait<br>[Mean ± SD (Range)] | Female (40%)                     |                             |                              |                              | Male (60%)                       |                                  |                            |                             | Combined                    |
|------------------------------------------------|----------------------------------|-----------------------------|------------------------------|------------------------------|----------------------------------|----------------------------------|----------------------------|-----------------------------|-----------------------------|
|                                                | Asian                            | Black or African American   | Hispanic or Latino/a         | White                        | Asian                            | Black or African American        | Hispanic or Latino/a       | White                       |                             |
| Basal secretion (ng/100 IEQs/min)              | 1.6 ± 0.94<br>(0.55 – 2.8)       | 0.42 ± 0.41<br>(0.04 – 1.3) | 0.49 ± 0.43<br>(0.037 – 1.5) | 0.31 ± 0.29<br>(0.033 – 1.6) | 0.38 ± 0.41<br>(0.053 – 1.2)     | 0.34 ± 0.44<br>(0.033 – 1.3)     | 0.4 ± 0.44<br>(0.01 – 1.9) | 0.36 ± 0.35<br>(0.02 – 1.7) | 0.39 ± 0.41<br>(0.01 – 2.8) |
| G 16.7 1st AUC (ng/100 IEQs)                   | 11 ± 2<br>(9 – 13)               | 4.5 ± 2.9<br>(0 – 8.8)      | 7.7 ± 4.7<br>(1.9 – 21)      | 5.2 ± 3.7<br>(0 – 18)        | 4.6 ± 2.9<br>(0.86 – 8.7)        | 5.3 ± 4.7<br>(0.16 – 17)         | 5.9 ± 3.7<br>(0 – 18)      | 7.1 ± 4.8<br>(0 – 22)       | 6.3 ± 4.3<br>(0 – 22)       |
| G 16.7 2nd AUC (ng/100 IEQs)                   | 43 ± 11<br>(31 – 55)             | 14 ± 8.9<br>(1 – 30)        | 21 ± 13<br>(5.1 – 52)        | 17 ± 10<br>(1.4 – 52)        | 16 ± 10<br>(3.4 – 32)            | 18 ± 12<br>(0.52 – 44)           | 19 ± 11<br>(0.69 – 51)     | 21 ± 13<br>(1.4 – 57)       | 19 ± 12<br>(0.52 – 57)      |
| G 16.7 AUC (ng/100 IEQs)                       | 54 ± 13<br>(40 – 67)             | 18 ± 11<br>(1.1 – 39)       | 29 ± 17<br>(9 – 68)          | 22 ± 14<br>(3.3 – 70)        | 20 ± 13<br>(4.3 – 41)            | 24 ± 16<br>(0.68 – 61)           | 25 ± 15<br>(0.89 – 69)     | 28 ± 17<br>(2 – 75)         | 26 ± 16<br>(0.68 – 75)      |
| G 16.7 SI                                      | 2.5 ± 0.66<br>(1.8 – 3.4)        | 6.3 ± 8.9<br>(1.5 – 34)     | 7.6 ± 8<br>(1.2 – 27)        | 6.8 ± 6.6<br>(1.3 – 36)      | 5.6 ± 4.2<br>(1.6 – 13)          | 7 ± 4.8<br>(1.5 – 15)            | 9.4 ± 13<br>(1.7 – 90)     | 8.5 ± 9.4<br>(1.4 – 78)     | 7.9 ± 9.4<br>(1.2 – 90)     |
| G 16.7 + IBMX 100 AUC (ng/100 IEQs)            | 37 ± 17<br>(24 – 62)             | 15 ± 9.6<br>(1.6 – 33)      | 22 ± 12<br>(6.7 – 52)        | 18 ± 11<br>(2.4 – 49)        | 21 ± 14<br>(4.5 – 51)            | 14 ± 10<br>(0.8 – 31)            | 19 ± 10<br>(3.2 – 51)      | 21 ± 12<br>(2.3 – 59)       | 20 ± 11<br>(0.8 – 62)       |
| G 16.7 + IBMX 100 SI                           | 6.1 ± 3.4<br>(2.2 – 11)          | 7 ± 6.4<br>(2.6 – 25)       | 20 ± 26<br>(1.6 – 100)       | 14 ± 19<br>(1.3 – 130)       | 15 ± 19<br>(2.2 – 59)            | 4.8 ± 3.5<br>(1.7 – 13)          | 19 ± 29<br>(1.6 – 190)     | 13 ± 15<br>(2 – 89)         | 14 ± 20<br>(1.3 – 190)      |
| G 1.7 + Ad 1 AUC (ng/100 IEQs)                 | -2.3 ± 1.7<br>(-4.4 – -0.88)     | -1.9 ± 2.9<br>(-8 – 6.1)    | -3 ± 3.6<br>(-11 – 0.32)     | -2.6 ± 3.3<br>(-16 – 0.77)   | -2 ± 2.1<br>(-6.1 – -0.44)       | -3 ± 3.6<br>(-11 – 0.03)         | -2.5 ± 3.4<br>(-17 – 1.2)  | -2.6 ± 3.1<br>(-16 – 1.4)   | -2.6 ± 3.2<br>(-17 – 6.1)   |
| G 1.7+Ad 1 II                                  | -0.22 ± 0.071<br>(-0.29 – -0.12) | -0.26 ± 0.28<br>(-0.89 – 0) | -0.18 ± 0.23<br>(-0.89 – 0)  | -0.23 ± 0.19<br>(-0.91 – 0)  | -0.21 ± 0.11<br>(-0.43 – -0.087) | -0.25 ± 0.16<br>(-0.55 – -0.093) | -0.22 ± 0.21<br>(-1 – 0)   | -0.25 ± 0.23<br>(-1 – 0)    | -0.23 ± 0.21<br>(-1 – 0)    |
| KCI 20 AUC (ng/100 IEQs)                       | 20 ± 7.2<br>(12 – 27)            | 7.8 ± 4.6<br>(1.4 – 18)     | 14 ± 8.5<br>(3 – 33)         | 10 ± 5.3<br>(3.9 – 28)       | 14 ± 8.9<br>(3.1 – 26)           | 9 ± 3.5<br>(1.2 – 13)            | 11 ± 6.2<br>(2.2 – 27)     | 14 ± 7.7<br>(1.7 – 42)      | 12 ± 7<br>(1.2 – 42)        |
| KCI 20 SI                                      | 55 ± 76<br>(3.1 – 168)           | 14 ± 20<br>(2 – 81)         | 54 ± 80<br>(1.8 – 373)       | 26 ± 28<br>(1.9 – 114)       | 44 ± 63<br>(2.6 – 188)           | 29 ± 48<br>(2.2 – 150)           | 29 ± 36<br>(2.7 – 157)     | 31 ± 57<br>(2.3 – 401)      | 31 ± 49<br>(1.8 – 401)      |



**Extended Data Table 2, related to Figure 2. Glucagon secretion is highly heterogeneous amongst donors.**

| Glucagon Secretion Trait<br>[Mean ± SD (Range)] | Female (38%)                    |                                  |                                  |                               | Male (62%)                     |                             |                              |                              | Combined                      |
|-------------------------------------------------|---------------------------------|----------------------------------|----------------------------------|-------------------------------|--------------------------------|-----------------------------|------------------------------|------------------------------|-------------------------------|
|                                                 | Asian                           | Black or African American        | Hispanic or Latino/a             | White                         | Asian                          | Black or African American   | Hispanic or Latino/a         | White                        |                               |
| Basal secretion (pg/100 IEQs/min)               | 30 ± 24<br>(4.8 – 54)           | 44 ± 34<br>(7.7 – 146)           | 46 ± 38<br>(3 – 142)             | 44 ± 61<br>(0.1 – 447)        | 46 ± 29<br>(15 – 90)           | 34 ± 39<br>(2.4 – 127)      | 45 ± 41<br>(1.4 – 236)       | 45 ± 42<br>(0.5 – 230)       | 44 ± 45<br>(0.1 – 447)        |
| G 16.7 AUC (pg/100 IEQs)                        | -525 ± 446<br>(-1156 – -155)    | -360 ± 1165<br>(-2855 – 1648)    | -704 ± 1285<br>(-5374 – 1177)    | -403 ± 1062<br>(-4027 – 2676) | -580 ± 851<br>(-2408 – 424)    | -334 ± 685<br>(-1920 – 427) | -823 ± 1135<br>(-6927 – 631) | -592 ± 966<br>(-3783 – 1679) | -583 ± 1053<br>(-6927 – 2676) |
| G 16.7 II                                       | -0.41 ± 0.12<br>(-0.49 – -0.23) | -0.44 ± 0.25<br>(-0.89 – -0.013) | -0.44 ± 0.31<br>(-0.99 – -0.034) | -0.48 ± 0.26<br>(-1 – 0)      | -0.5 ± 0.24<br>(-0.8 – -0.097) | -0.47 ± 0.27<br>(-1 – 0)    | -0.41 ± 0.25<br>(-1 – 0)     | -0.44 ± 0.24<br>(-1 – 0)     | -0.45 ± 0.25<br>(-1 – 0)      |
| G 16.7 + IBMX 100 AUC (pg/100 IEQs)             | 280 ± 241<br>(0 – 555)          | 320 ± 270<br>(0 – 900)           | 365 ± 203<br>(63 – 775)          | 344 ± 382<br>(0 – 2265)       | 372 ± 206<br>(112 – 772)       | 307 ± 198<br>(0 – 589)      | 383 ± 297<br>(0 – 1582)      | 367 ± 293<br>(0 – 1329)      | 359 ± 302<br>(0 – 2265)       |
| G 16.7 + IBMX 100 SI                            | 3.4 ± 1.1<br>(2.4 – 4.9)        | 6.8 ± 12<br>(1 – 46)             | 9.2 ± 18<br>(1.2 – 78)           | 7.1 ± 21<br>(1 – 170)         | 3.8 ± 3.2<br>(1.3 – 10)        | 19 ± 47<br>(1.6 – 144)      | 5.7 ± 7.8<br>(1 – 50)        | 5.2 ± 15<br>(1 – 155)        | 6.5 ± 17<br>(1 – 170)         |
| G 1.7 + Ad 1 AUC (pg/100 IEQs)                  | 549 ± 367<br>(0 – 769)          | 661 ± 543<br>(9 – 1862)          | 744 ± 455<br>(51 – 1726)         | 737 ± 574<br>(0 – 3557)       | 600 ± 386<br>(200 – 1085)      | 470 ± 340<br>(114 – 1170)   | 759 ± 566<br>(71 – 2924)     | 766 ± 562<br>(0 – 3195)      | 734 ± 543<br>(0 – 3557)       |
| G 1.7 + Ad 1 SI                                 | 5.3 ± 4.9<br>(2.8 – 13)         | 2.9 ± 1.8<br>(1.1 – 7.4)         | 4.4 ± 4.2<br>(1.1 – 23)          | 8.3 ± 38<br>(1.1 – 316)       | 3.9 ± 3<br>(1.2 – 10)          | 3.5 ± 2.1<br>(1.3 – 8.2)    | 4.1 ± 3.2<br>(1.2 – 19)      | 4.5 ± 10<br>(1.1 – 109)      | 5.1 ± 19<br>(1.1 – 316)       |
| KCI 20 AUC (pg/100 IEQs)                        | 551 ± 351<br>(128 – 902)        | 682 ± 633<br>(0 – 2297)          | 754 ± 497<br>(138 – 1976)        | 641 ± 478<br>(0 – 2456)       | 596 ± 475<br>(0 – 1590)        | 459 ± 351<br>(124 – 1247)   | 513 ± 384<br>(0 – 1956)      | 637 ± 532<br>(0 – 2890)      | 618 ± 488<br>(0 – 2890)       |
| KCI 20 SI                                       | 15 ± 20<br>(4.3 – 46)           | 16 ± 32<br>(1.6 – 134)           | 13 ± 22<br>(2.1 – 101)           | 17 ± 55<br>(1.4 – 434)        | 5.7 ± 4.6<br>(1.2 – 16)        | 6.5 ± 3.5<br>(1.7 – 13)     | 8.8 ± 19<br>(1.6 – 148)      | 8.3 ± 13<br>(1 – 100)        | 11 ± 30<br>(1 – 434)          |

**Extended Data Table 3, related to Figure 2. Distribution of insulin secretion traits is similar in N=268 subset.**

| Insulin Secretion Trait<br>[Mean ± SD (Range)] | Female (40%)                  |                             |                              |                             | Male (60%)                           |                                |                             |                             | Combined                    |
|------------------------------------------------|-------------------------------|-----------------------------|------------------------------|-----------------------------|--------------------------------------|--------------------------------|-----------------------------|-----------------------------|-----------------------------|
|                                                | East Asian                    | African                     | Admixed American             | European                    | East Asian                           | African                        | Admixed American            | European                    |                             |
| Basal secretion<br>(ng/100 IEQs/min)           | 1.3 ± 0.98<br>(0.36 – 2.8)    | 0.42 ± 0.41<br>(0.04 – 1.3) | 0.39 ± 0.38<br>(0.037 – 1.3) | 0.31 ± 0.29<br>(0.04 – 1.6) | 0.47 ± 0.45<br>(0.053 – 1.2)         | 0.36 ± 0.34<br>(0.057 – 0.8)   | 0.41 ± 0.44<br>(0.01 – 1.9) | 0.34 ± 0.35<br>(0.02 – 1.7) | 0.38 ± 0.41<br>(0.01 – 2.8) |
| G 16.7 1st AUC<br>(ng/100 IEQs)                | 9.8 ± 2.5<br>(6.6 – 13)       | 4.5 ± 2.9<br>(0 – 8.8)      | 6.8 ± 4.9<br>(1.6 – 21)      | 5.3 ± 3.9<br>(0 – 18)       | 4.4 ± 3.2<br>(0.86 – 8.7)            | 7.2 ± 6.5<br>(2.1 – 17)        | 6.6 ± 4.2<br>(0 – 19)       | 6.9 ± 4.9<br>(0 – 22)       | 6.3 ± 4.4<br>(0 – 22)       |
| G 16.7 2nd AUC<br>(ng/100 IEQs)                | 39 ± 14<br>(21 – 55)          | 14 ± 8.9<br>(1 – 30)        | 19 ± 13<br>(5.1 – 52)        | 17 ± 11<br>(1.4 – 52)       | 16 ± 12<br>(3.4 – 32)                | 22 ± 15<br>(13 – 44)           | 21 ± 12<br>(0.69 – 55)      | 20 ± 13<br>(1.8 – 57)       | 20 ± 12<br>(0.69 – 57)      |
| G 16.7 AUC<br>(ng/100 IEQs)                    | 48 ± 16<br>(28 – 67)          | 18 ± 11<br>(1.1 – 39)       | 26 ± 17<br>(9 – 68)          | 22 ± 14<br>(3.3 – 70)       | 21 ± 15<br>(4.3 – 41)                | 29 ± 21<br>(16 – 61)           | 28 ± 16<br>(0.89 – 74)      | 27 ± 17<br>(2.2 – 75)       | 26 ± 16<br>(0.89 – 75)      |
| G 16.7 SI                                      | 2.8 ± 0.87<br>(1.8 – 4)       | 6.3 ± 8.9<br>(1.5 – 34)     | 8.1 ± 8.2<br>(1.2 – 27)      | 6.7 ± 6.7<br>(1.3 – 36)     | 5.1 ± 4.5<br>(1.6 – 13)              | 7.8 ± 5.6<br>(1.6 – 15)        | 8.5 ± 8.3<br>(1.8 – 31)     | 8.4 ± 9.4<br>(1.4 – 78)     | 7.7 ± 8.2<br>(1.2 – 78)     |
| G 16.7 + IBMX 100 AUC<br>(ng/100 IEQs)         | 34 ± 17<br>(20 – 62)          | 15 ± 9.6<br>(1.6 – 33)      | 20 ± 13<br>(6.6 – 52)        | 18 ± 10<br>(2.4 – 49)       | 24 ± 16<br>(4.5 – 51)                | 17 ± 13<br>(5.8 – 31)          | 20 ± 11<br>(3.2 – 51)       | 21 ± 12<br>(2.3 – 59)       | 20 ± 12<br>(1.6 – 62)       |
| G 16.7 + IBMX 100 SI                           | 6.6 ± 3.2<br>(2.2 – 11)       | 7 ± 6.4<br>(2.6 – 25)       | 22 ± 26<br>(1.6 – 100)       | 14 ± 20<br>(1.3 – 130)      | 15 ± 22<br>(2.2 – 59)                | 5.7 ± 5<br>(1.7 – 13)          | 16 ± 19<br>(1.6 – 90)       | 13 ± 15<br>(2 – 89)         | 14 ± 18<br>(1.3 – 130)      |
| G 1.7 + Ad 1 AUC (ng/100<br>IEQs)              | -1.9 ± 1.7<br>(-4.4 – -0.46)  | -1.9 ± 2.9<br>(-8 – 6.1)    | -2.3 ± 3.4<br>(-11 – 0.32)   | -2.8 ± 3.4<br>(-16 – 0.77)  | -2.5 ± 2.2<br>(-6.1 – -0.53)         | -3.1 ± 1.8<br>(-4.3 – -0.49)   | -2.7 ± 3.4<br>(-17 – 0.48)  | -2.5 ± 3.2<br>(-16 – 1.4)   | -2.6 ± 3.2<br>(-17 – 6.1)   |
| G 1.7+Ad 1 II                                  | -0.25 ± 0.1<br>(-0.4 – -0.12) | -0.26 ± 0.28<br>(-0.89 – 0) | -0.21 ± 0.27<br>(-0.89 – 0)  | -0.22 ± 0.18<br>(-0.91 – 0) | -0.17 ± 0.073<br>(-0.27 –<br>-0.087) | -0.2 ± 0.068<br>(-0.3 – -0.15) | -0.24 ± 0.23<br>(-1 – 0)    | -0.24 ± 0.2<br>(-1 – 0)     | -0.23 ± 0.21<br>(-1 – 0)    |
| KCI 20 AUC (ng/100 IEQs)                       | 19 ± 6.8<br>(12 – 27)         | 7.8 ± 4.6<br>(1.4 – 18)     | 13 ± 8.6<br>(3.5 – 33)       | 11 ± 5.5<br>(3.9 – 28)      | 16 ± 9.7<br>(3.1 – 26)               | 10 ± 2.9<br>(6.8 – 13)         | 12 ± 6.5<br>(2.2 – 27)      | 14 ± 7.9<br>(1.7 – 42)      | 12 ± 7.1<br>(1.4 – 42)      |
| KCI 20 SI                                      | 48 ± 68<br>(3.1 – 168)        | 14 ± 20<br>(2 – 81)         | 59 ± 82<br>(2.8 – 373)       | 25 ± 28<br>(1.9 – 114)      | 47 ± 73<br>(2.6 – 188)               | 17 ± 24<br>(3.1 – 53)          | 26 ± 31<br>(2.5 – 156)      | 36 ± 62<br>(2.3 – 401)      | 32 ± 51<br>(1.9 – 401)      |

**Extended Data Table 4, related to Figure 2. Distribution of glucagon secretion traits is similar in N=268 subset.**

| Glucagon Secretion Trait<br>[Mean ± SD (Range)] | Female (40%)                 |                                  |                                 |                               | Male (60%)                     |                               |                               |                              | Combined                      |
|-------------------------------------------------|------------------------------|----------------------------------|---------------------------------|-------------------------------|--------------------------------|-------------------------------|-------------------------------|------------------------------|-------------------------------|
|                                                 | East Asian                   | African                          | Admixed American                | European                      | East Asian                     | African                       | Admixed American              | European                     |                               |
| Basal secretion (pg/100 IEQs/min)               | 24 ± 24<br>(1.6 – 54)        | 44 ± 34<br>(7.7 – 146)           | 40 ± 37<br>(3 – 142)            | 47 ± 63<br>(0.1 – 447)        | 52 ± 32<br>(15 – 90)           | 54 ± 53<br>(12 – 127)         | 43 ± 38<br>(1.4 – 236)        | 44 ± 42<br>(0.5 – 230)       | 44 ± 46<br>(0.1 – 447)        |
| G 16.7 AUC (pg/100 IEQs)                        | -420 ± 452<br>(-1156 – 0)    | -360 ± 1165<br>(-2855 – 1648)    | -677 ± 1251<br>(-5374 – 1177)   | -406 ± 1117<br>(-4027 – 2676) | -590 ± 993<br>(-2408 – 424)    | -466 ± 1012<br>(-1920 – 427)  | -772 ± 1124<br>(-6927 – 1679) | -585 ± 948<br>(-3783 – 1489) | -577 ± 1065<br>(-6927 – 2676) |
| G 16.7 II                                       | -0.53 ± 0.28<br>(-1 – -0.23) | -0.44 ± 0.25<br>(-0.89 – -0.013) | -0.4 ± 0.31<br>(-0.99 – -0.033) | -0.49 ± 0.26<br>(-1 – 0)      | -0.55 ± 0.22<br>(-0.8 – -0.27) | -0.5 ± 0.16<br>(-0.7 – -0.33) | -0.42 ± 0.24<br>(-1 – 0)      | -0.44 ± 0.25<br>(-1 – 0)     | -0.45 ± 0.25<br>(-1 – 0)      |
| G 16.7 + IBMX 100 AUC (pg/100 IEQs)             | 250 ± 219<br>(0 – 555)       | 320 ± 270<br>(0 – 900)           | 278 ± 164<br>(63 – 606)         | 365 ± 398<br>(0 – 2265)       | 437 ± 193<br>(208 – 772)       | 363 ± 192<br>(124 – 589)      | 375 ± 297<br>(0 – 1582)       | 347 ± 271<br>(0 – 1329)      | 350 ± 299<br>(0 – 2265)       |
| G 16.7 + IBMX 100 SI                            | 5.6 ± 5<br>(2.4 – 14)        | 6.8 ± 12<br>(1 – 46)             | 9.4 ± 18<br>(1.2 – 78)          | 6.9 ± 22<br>(1 – 170)         | 4.2 ± 3.6<br>(1.3 – 10)        | 2.8 ± 2.3<br>(1.6 – 6.3)      | 5.3 ± 7.7<br>(1 – 50)         | 5.5 ± 16<br>(1 – 155)        | 6.1 ± 16<br>(1 – 170)         |
| G 1.7 + Ad 1 AUC (pg/100 IEQs)                  | 496 ± 339<br>(0 – 769)       | 661 ± 543<br>(9 – 1862)          | 617 ± 433<br>(0 – 1538)         | 776 ± 588<br>(30 – 3557)      | 712 ± 384<br>(266 – 1085)      | 431 ± 236<br>(155 – 723)      | 749 ± 557<br>(71 – 2924)      | 733 ± 526<br>(0 – 2693)      | 722 ± 532<br>(0 – 3557)       |
| G 1.7 + Ad 1 SI                                 | 8.6 ± 8.5<br>(2.8 – 22)      | 2.9 ± 1.8<br>(1.1 – 7.4)         | 4.3 ± 4.4<br>(1.1 – 23)         | 8.4 ± 40<br>(1.1 – 316)       | 4.3 ± 3.4<br>(1.2 – 10)        | 2.4 ± 1.2<br>(1.3 – 4.1)      | 4.1 ± 3.1<br>(1.2 – 19)       | 4.6 ± 11<br>(1.1 – 109)      | 5.2 ± 20<br>(1.1 – 316)       |
| KCI 20 AUC (pg/100 IEQs)                        | 481 ± 342<br>(128 – 902)     | 682 ± 633<br>(0 – 2297)          | 637 ± 466<br>(0 – 1669)         | 679 ± 487<br>(54 – 2456)      | 636 ± 536<br>(0 – 1590)        | 577 ± 459<br>(223 – 1247)     | 520 ± 396<br>(0 – 1956)       | 622 ± 510<br>(0 – 2890)      | 614 ± 480<br>(0 – 2890)       |
| KCI 20 SI                                       | 17 ± 18<br>(4.3 – 46)        | 16 ± 32<br>(1.6 – 134)           | 14 ± 23<br>(1.4 – 101)          | 17 ± 58<br>(1.6 – 434)        | 6.1 ± 5.3<br>(1.2 – 16)        | 4.6 ± 2.2<br>(1.7 – 6.5)      | 8.5 ± 18<br>(1.6 – 148)       | 8.7 ± 15<br>(1 – 100)        | 12 ± 32<br>(1 – 434)          |
